# Supplementary material for: Dual use of combustible and heated tobacco products exacerbates long COVID prevalence: a JASTIS 2023 cross‑sectional study
Source: Research Square preprint supplement (doi:10.21203/rs.3.rs-6669862/v1), 2025-05-28
Supplement: Supplementary file 1 [file 49f0cf95f67e025dc7d04bef.docx]

Supplementary Information

Supplementary Table S1 : Details of comorbidities (weighted)

|  |  | Previous history of COVID-19 | |
| --- | --- | --- | --- |
|  | Total | None | Yes |
|  | 28250 | 23175 | 5075 |
| Hypertension | 5902 (20.9) | 5091 (22.0) | 810 (16.0) |
| Diabetes | 2066 (7.3) | 1729 (7.5) | 336 (6.6) |
| Dyslipidemia | 3985 (14.1) | 3364 (14.5) | 621 (12.3) |
| Bronchitis | 484 (1.7) | 309 (1.3) | 174 (3.5) |
| Asthma | 974 (3.4) | 705 (3.0) | 269 (5.3) |
| Atopic dermatitis | 1522 (5.4) | 1106 (4.8) | 416 (8.2) |
| Allergic rhinitis | 5506 (19.5) | 4280 (18.5) | 1225 (24.2) |
| Periodontal disease | 4176 (14.8) | 3535 (15.3) | 641 (12.6) |
| Dental caries | 3909 (13.8) | 3203 (13.8) | 705 (13.9) |
| Angina pectoris | 697 (2.5) | 504 (2.2) | 193 (3.8) |
| Stroke | 426 (1.5) | 254 (1.1) | 171 (3.4) |
| Chronic obstructive pulmonary disease | 358 (1.3) | 203 (0.9) | 155 (3.1) |
| Chronic kidney disease | 509 (1.8) | 345 (1.5) | 164 (3.2) |
| Chronic hepatitis | 393 (1.4) | 230 (1.0) | 163 (3.2) |
| Immune disorder | 682 (2.4) | 462 (2.0) | 219 (4.3) |
| Malignant tumor | 714 (2.5) | 522 (2.3) | 191 (3.8) |
| Chronic pain for more than 3 months | 4758 (16.8) | 3903 (16.8) | 855 (16.9) |
| Depression | 1307 (4.6) | 971 (4.2) | 336 (6.6) |
| Alcoholism | 327 (1.2) | 179 (0.8) | 148 (2.9) |
| Other mental disorders | 949 (3.4) | 703 (3.0) | 245 (4.8) |

Supplementary Table S2 :Baseline characteristics of participants (Unweighted).

|  |  | Previous history of COVID-19 | |
| --- | --- | --- | --- |
|  | Total | None | Yes |
|  | 28250 | 23175 | 5075 |
| Age, median (IQR) years | 47[33, 63] | 50 [35, 66] | 37 [28, 48] |
| Sex, n (%) | |  |  |
| Male | 13984 (49.5) | 11419 (49.3) | 2565 (50.5) |
| Female | 14266 (50.5) | 11756 (50.7) | 2510 (49.5) |
| Smoking status, n (%) | |  |  |
| Current user | 6001 (21.2) | 4839 (20.9) | 1162 ( 22.9) |
| Only CCs | 2901 (10.3) | 2534 (10.9) | 367 (7.2) |
| Only HTPs | 892 (3.2) | 718 (3.1) | 174 (3.4) |
| Dual tobacco products | 2208 (7.8) | 1587 (6.8) | 621 (12.2) |
| Former user | 4702 (16.6) | 4019 (17.3) | 683 (13.5) |
| Never user | 17547 (62.1) | 14317 (61.8) | 3230 (63.6) |
| SARS-CoV-2 vaccination status, n(%) | | |  |
| Two times or more | 24916 (88.2) | 20508 (88.5) | 4408 (86.9) |
| Three times or more | 21864 (77.4) | 18373 (79.3) | 3491 (68.8) |
| Four times or more | 14357 (50.8) | 12772 (55.1) | 1585 (31.2) |
| Comorbidities, n (%) | |  |  |
| One comorbidity | 7183 (25.4) | 5945 (25.7) | 1238 (24.4) |
| Two or more | 9456 (33.5) | 7864 (33.9) | 1592 (31.4) |
| BMI, median (IQR) kg/m2 | 21.6 [19.6, 24] | 21.6 [19.6, 24.1] | 21.5 [19.5, 23.7] |
| Education, n (%) | |  |  |
| Junior high school/high school | 7932 (28.1) | 6694 (28.9) | 1238 (24.4) |
| University/technical school or more | 20318 (71.9) | 16481 (71.1) | 3837 (75.6) |
| Income over 4 million yen, n (%) | 13748 (48.7) | 10668 (46.0) | 3080 (60.7) |
| Persistent symptom more than two months | | |  |
| Arthralgia | 4660 (16.5) | 3982 (17.2) | 678 (13.4) |
| Headache | 2907 (10.3) | 2280 (9.8) | 627 (12.4) |
| Chest pain | 725 (2.6) | 530 (2.3) | 195 (3.8) |
| Cough | 1099 (3.9) | 877 (3.8) | 222 (4.4) |
| Dyspnea | 1473 (5.2) | 1177 (5.1) | 296 (5.8) |
| Dysgeusia | 255 (0.9) | 157 (0.7) | 98 (1.9) |
| Dysosmia | 326 (1.2) | 222 (1.0) | 104 (2.0) |
| Memory impairment | 1382 (4.9) | 1121 (4.8) | 261 (5.1) |
| Loss of concentration | 2665 (9.4) | 2175 (9.4) | 490 (9.7) |
| Hair loss | 1599 (5.7) | 1317 (5.7) | 282 (5.6) |
| Sexual dysfunction | 1651 (5.8) | 1417 (6.1) | 234 (4.6) |
| Fatigue | 2648 (9.4) | 2179 (9.4) | 469 (9.2) |
